# Supplementary material for: Phosphorylation of Histone H4T80 Triggers DNA Damage Checkpoint Recovery
Source: PubMed Central journal article supplement (PMC6242705; doi:10.1016/j.molcel.2018.09.023), 2018-11-15
Supplement: mmc1.pdf [file mmc1.pdf]

**Molecular Cell, Volume 72**

**Supplemental Information**

**Phosphorylation of Histone H4T80**

**Triggers DNA Damage Checkpoint Recovery**

**Gonzalo Millan-Zambrano, Helena Santos-Rosa, Fabio Puddu, Samuel C. Robson, Stephen P. Jackson, and Tony Kouzarides**

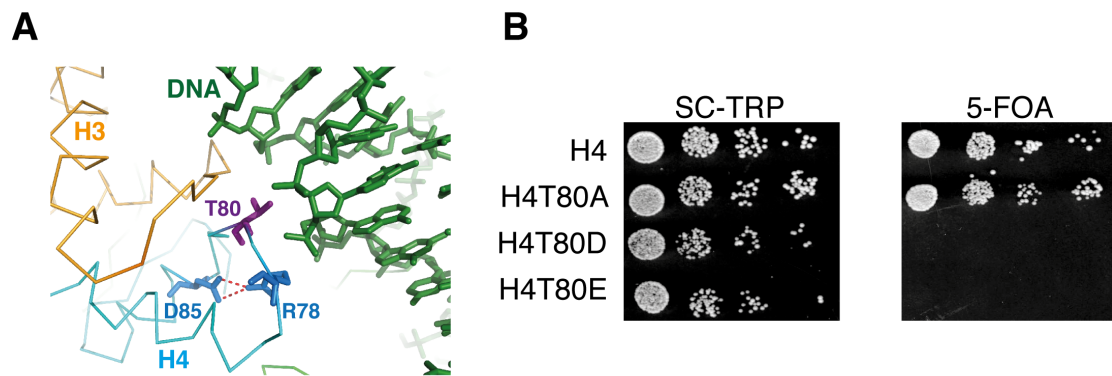

**Figure S1. Histone H4T80 phosphorylation levels must be tightly regulated. Related to Figure 1. (A)** Ribbon structure of H3 L1 loop and H4 L2 loop indicating hydrogen bonds between H4R78 and H4D85. **(B)** Spot test for cell viability. 10-fold serial dilutions were used.

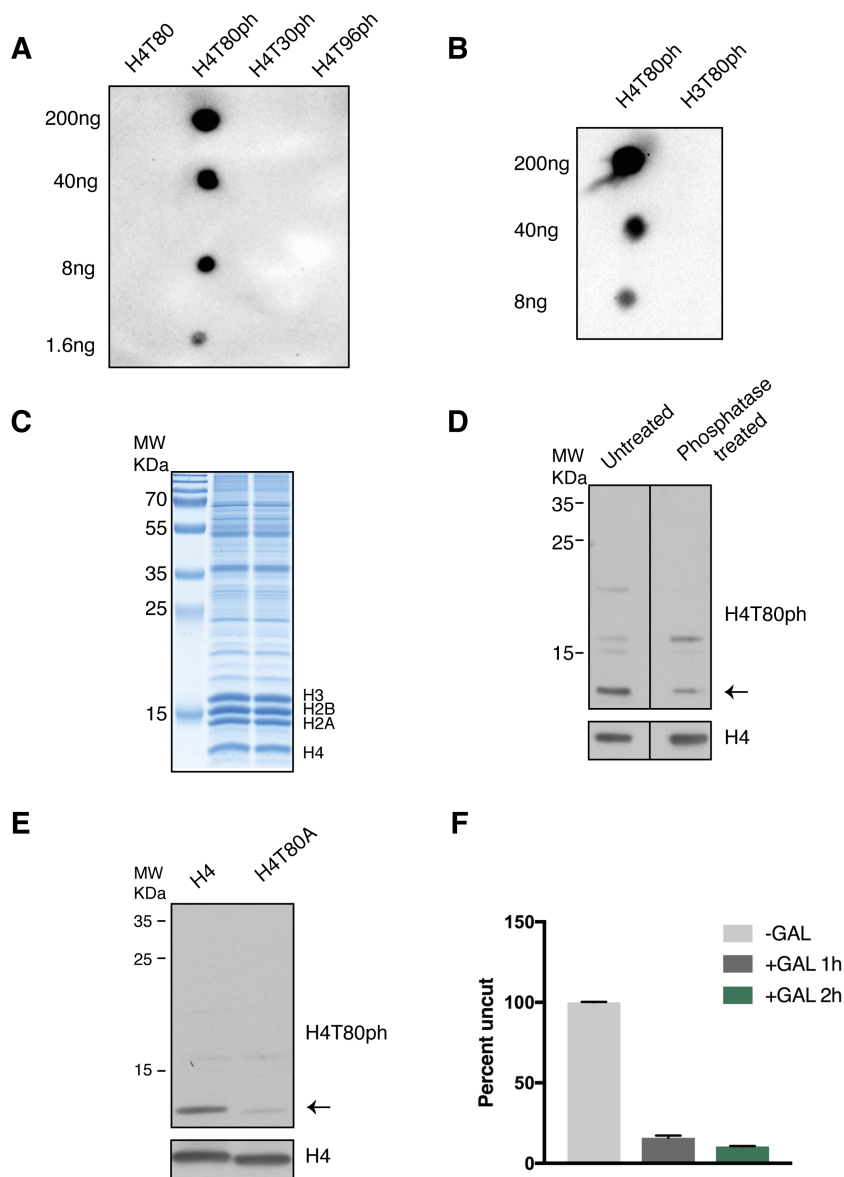

**Figure S2. Anti-H4T80ph antibody specifically recognizes H4T80ph in yeast. Related to Figure 1. (A) and (B)** Dot-blot analysis using H4T80ph specific antibody. 5-fold serial dilutions of different peptides, as indicated, were spotted onto a PVDF membrane. **(C)** Coomassie blue stained gel showing purified yeast histones separated by SDS-PAGE in 17% acrylamide gels. **(D)** Immunoblot analysis of purified yeast histones separated by SDS-PAGE in 17% acrylamide gels. Nitrocellulose membranes were treated or not with alkaline phosphatase. Blots were probed with anti-H4T80ph antibody and then re-probed with anti-H4 antibody as indicated. ← Corresponds to histone H4. **(E)** Immunoblot analysis of purified yeast histones separated by SDS-PAGE in 17% acrylamide gels. Both wild type and H4T80A mutant cells were grown to exponential phase. Blots were probed with anti-H4T80ph antibody and then re-probed with anti-H4 antibody as indicated. **(F)** HO cutting efficiency was measured by qPCR using primers encompassing the HO cut site and normalized to the *PRP8* reference locus. The mean of the non-induced samples was calculated as 100% uncut. Graphs show mean +SEM of three biological replicates.

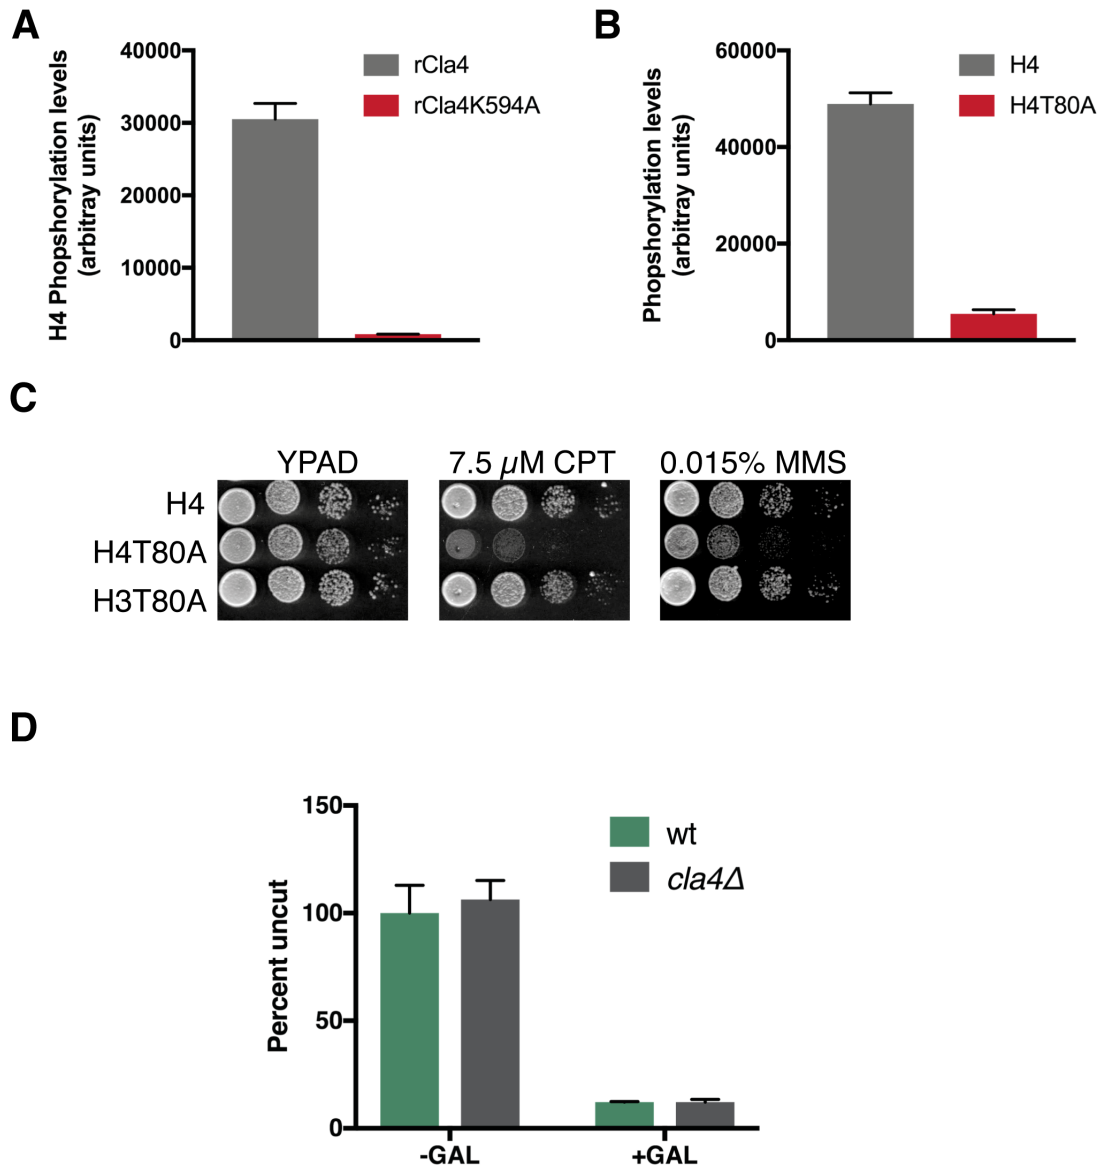

**Figure S3. Cla4 phosphorylates H4T80 *in vivo* and *in vitro*.** Related to Figure 2 and Figure 3. (A) and (B) Quantification of kinase experiments shown in Figure 2D and 2E respectively. Data are represented as mean +SEM of two independent experiments. (C) Spot test for DNA damage sensitivity of different yeast histone point mutants as indicated. 10-fold serial dilutions were used. (D) HO cutting efficiency was measured by qPCR using primers encompassing the HO cut site and normalized to the *PRP8* reference locus. The mean of the non-induced samples was calculated as 100% uncut. Graphs show mean +SEM of three biological replicates.

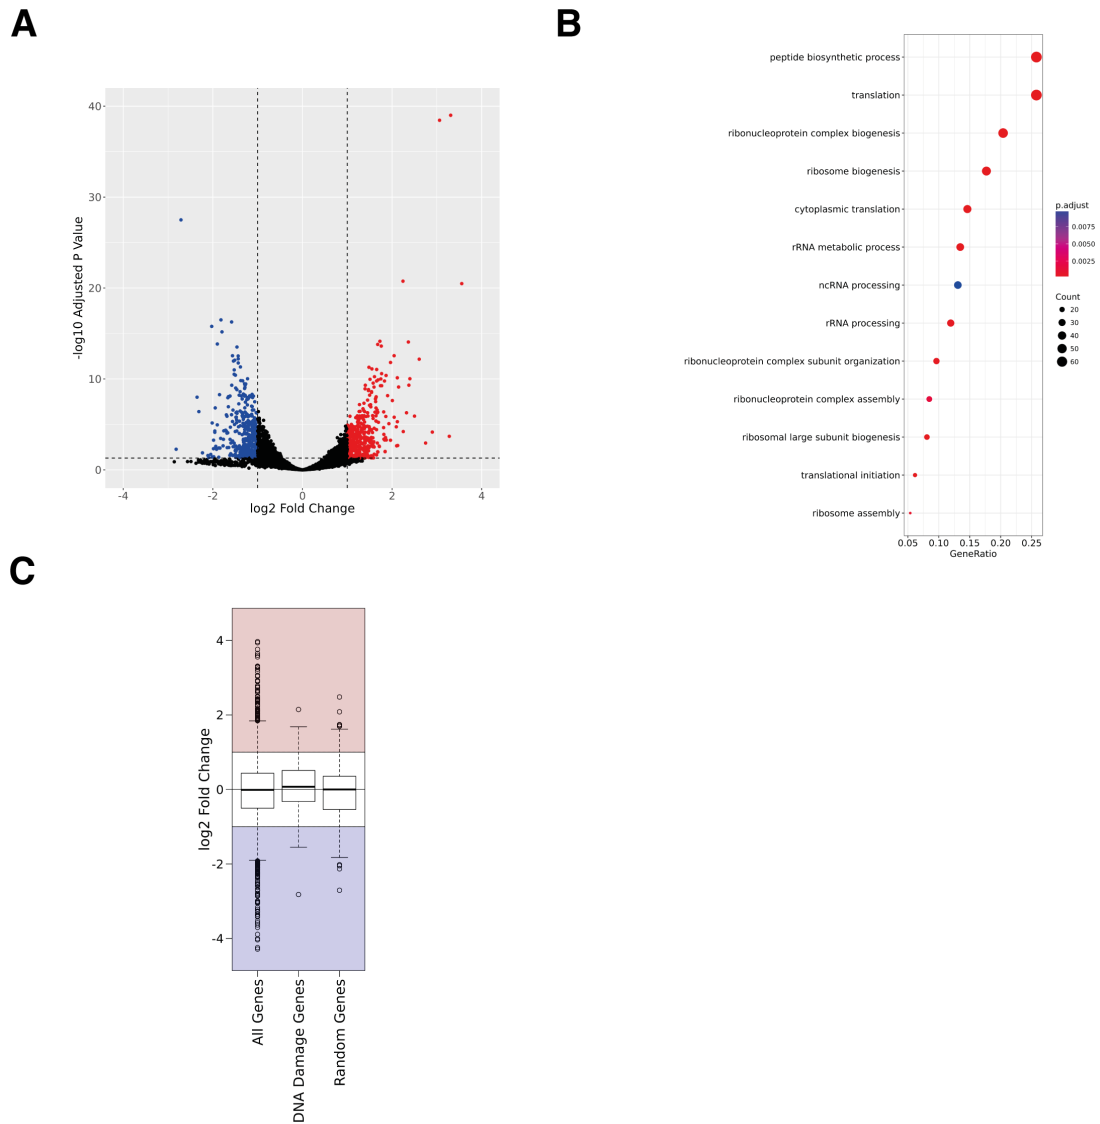

**Figure S4. H4T80A mutation does not particularly impair the expression of genes involved in the DDR. Related to Figure 4. (A)** Volcano plot showing the global differential expression between H4T80A mutant and wild type samples. The x-axis represents the log<sub>2</sub> fold change and the y-axis represents the -log<sub>10</sub> of the adjusted p-value from the DESeq2 differential expression analysis. Significantly up-regulated (fold change > 2, adjusted p value < 0.05) and down-regulated (fold change < 2, adjusted p value < 0.05) genes are highlighted in red and blue respectively. **(B)** Dot-plot of gene ontology terms enriched for genes down-regulated in H4T80A mutant cells compared to wild type. For each term, GeneRatio represents the proportion of genes in a given GO term that are significantly down-regulated. The size of the dots is representative of the total number of genes, whilst the colour is representative of the p value from the over-representation test. Genes up-regulated in the H4T80A mutant show no enrichment in the GO analysis. **(C)** Boxplot showing the distribution of log<sub>2</sub> fold change values from the DESeq2 differential expression analysis for; all genes, 206 genes involved in the DNA damage response (based on GO term GO:0006974), and a random subset of 206 genes. Genes up- or down-regulated greater than 2-fold are highlighted in red or blue respectively.

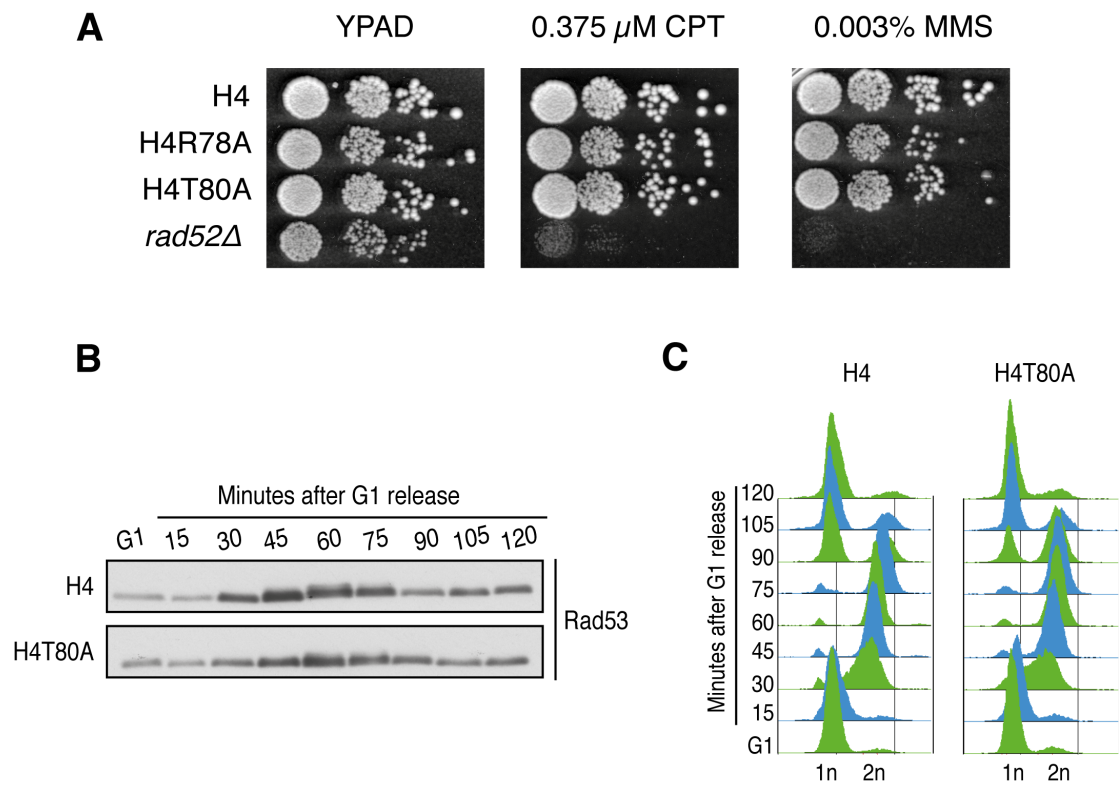

**Figure S5. H4T80A mutation does not impair cell cycle progression. Related to Figure 4.** (A) Spot test for DNA damage sensitivity of different yeast mutants as indicated. 10-fold serial dilutions were used. (B) Immunoblot analysis of Rad53 phosphorylation levels evaluated by mobility shift in SDS-PAGE gels. Wild type or H4T80A mutant cells were arrested in G1 using  $\alpha$ -factor, and then released for 120 min. Samples were taken every 15 min.  $\alpha$ -factor was added again after 45 min to arrest cells in G1. (C) Flow cytometry analysis of the same samples taken in B.

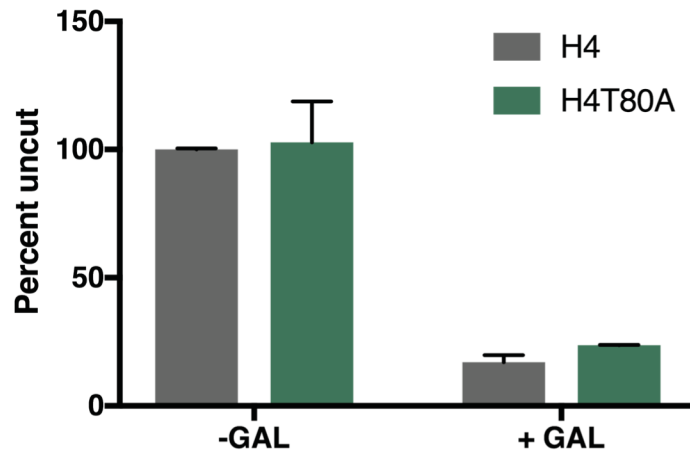

**Figure S6. DSB is induced to the same extent in H4T80A mutant and wild type cells. Related to Figure 5.** HO cutting efficiency was measured by qPCR using primers encompassing the HO cut site and normalized to the *PRP8* reference locus. The mean of the non-induced samples was calculated as 100% uncut. Graphs show mean +SEM of two biological replicates.

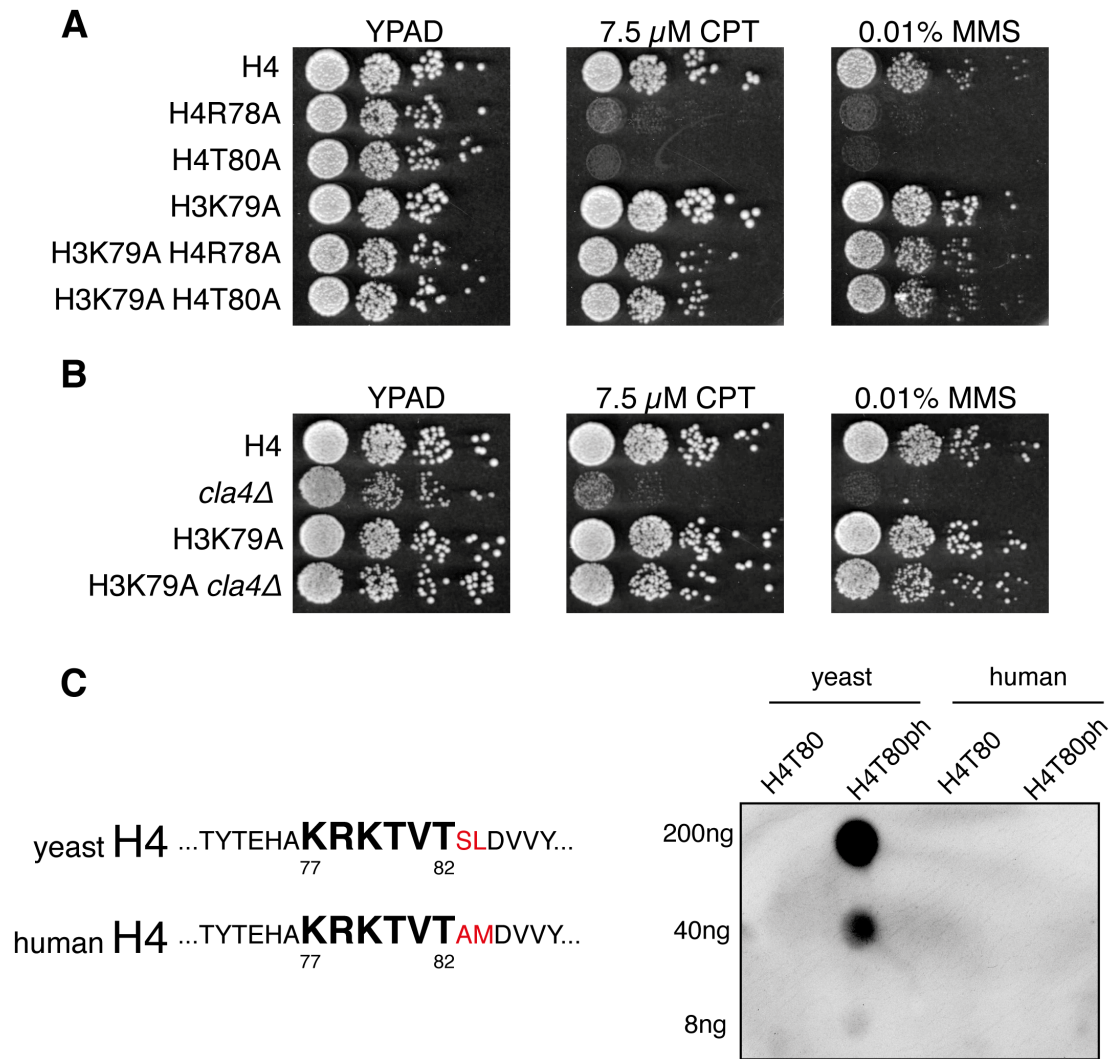

**Figure S7. Mutation of H3K79A suppresses H4T80A and *cla4* $\Delta$  mutant hypersensitivity to DNA damaging agents. Related to Figure 6. (A) and (B) Spot test for DNA damage sensitivity of different yeast mutants as indicated. 10-fold serial dilutions were used. (C) **Left** Comparison of yeast and human histone H4 L2 loop sequence. **Right** Dot-blot analysis using H4T80ph specific antibody. 5-fold serial dilutions of different peptides, as indicated, were spotted onto a PVDF membrane.**



| Strain  | Genotype                                                                                                              | Source                 |
|---------|-----------------------------------------------------------------------------------------------------------------------|------------------------|
| PTY1    | <i>Mat a hht2,hhf2::natMX4, hht1,hhf1::kanMX4</i><br>pURA3-HHT1-HHF1                                                  | (Tessarz et al., 2014) |
| GMY041  | PTY1 <i>cla4::hphMX4</i>                                                                                              | This study             |
| GMY042  | PTY1 <i>skm1::hphMX4</i>                                                                                              | This study             |
| GMY043  | PTY1 <i>ste20::hphMX4</i>                                                                                             | This study             |
| GMY044  | PTY1 <i>rad52::hphMX4</i>                                                                                             | This study             |
| GMY045  | PTY1 <i>RAD9-3HA::HIS3</i>                                                                                            | This study             |
| GMY046  | PTY1 <i>RTT107-3HA::HIS3</i>                                                                                          | This study             |
| GMY047  | PTY1 <i>dot1::HIS3</i>                                                                                                | This study             |
| GMY048  | PTY1 <i>cla4::hphMX4, dot1::HIS3</i>                                                                                  | This study             |
| PTY2    | <i>Mat a hht2,hhf2::KanMX4, hht1,hhf1::HIS3,</i><br><i>hta1,htb1::NatMX6, hta2, htb2::hphMX6</i><br>pURA3-HHT1-HHF1   | (Tessarz et al., 2014) |
| JKM179  | <i>MAT<math>\alpha</math> ade1 leu2-3,112, lys5, trp1::hisG, ura3-52,</i><br><i>hml::ADE1 hmr::ADE1 ade3::GAL::HO</i> | (Lee et al., 1998)     |
| GMY049  | JKM179 <i>CLA4-6HA::kanMX4</i>                                                                                        | This study             |
| GMY050  | JKM179 <i>cla4::hphMX4</i>                                                                                            | This study             |
| GMY051  | JKM179 <i>hht2,hhf2::natMX4, hht1,hhf1::kanMX4</i>                                                                    | This study             |
| GMY052  | GMY051 <i>RTT107-6HA::hphMX4</i>                                                                                      | This study             |
| GMY053  | <i>Mat a hht2,hhf2::natMX4, hht1,hhf1::LEU2</i><br>pURA3-HHT1-HHF1                                                    | This study             |
| GMY053  | GMY053 <i>rad53-R605A::kanMX6</i>                                                                                     |                        |
| MKY5    | <i>MAT<math>\alpha</math> ade2-1 can1-100 his3-11 leu2-3,112 trp1-1 ura3-1</i>                                        | (Leung et al., 2016)   |
| MKY1671 | MKY5, <i>rtt107::kanMX6</i><br><i>pRS315, RTT107-3XFLAG::natMX6</i>                                                   | (Leung et al., 2016)   |
| MKY1672 | MKY5, <i>rtt107::kanMX6</i><br><i>pRS315, rtt107-K887M-3XFLAG::natMX6</i>                                             | (Leung et al., 2016)   |
| MKY1731 | MKY5, <i>rtt107::KANMX6</i><br><i>pRS315, rtt107-K426M-3XFLAG::NATMX6</i>                                             | (Leung et al., 2016)   |

**Table S1. Yeast Strains used in this study. Related to Key Resources Table.** Strains are derivatives of W303. Histone point mutants were shuffled into yeast by counter-selection on 5-FOA.
